# Correction: H<sub>2</sub>O<sub>2</sub> treatment or serum deprivation induces autophagy and apoptosis in naked mole-rat skin fibroblasts by inhibiting the PI3K/Akt signaling pathway

Shanmin Zhao, Li Li, Shiyong Wang, Chenlin Yu, Bang Xiao, Lifang Lin, Wei Cong, Jishuai Cheng, Wenjing Yang, Wei Sun, Shufang Cui

Copyright: Zhao et al. This is an open-access article distributed under the terms of the Creative Commons Attribution License 3.0 (CC BY 3.0), which permits unrestricted use, distribution, and reproduction in any medium, provided the original author and source are credited.

**Present:** The images displayed in Figure 4.

**Correct:** The proper figure 4 appears below.

Original article: Oncotarget. 2016; 7:84839-84850. doi: 10.18632/oncotarget.13321

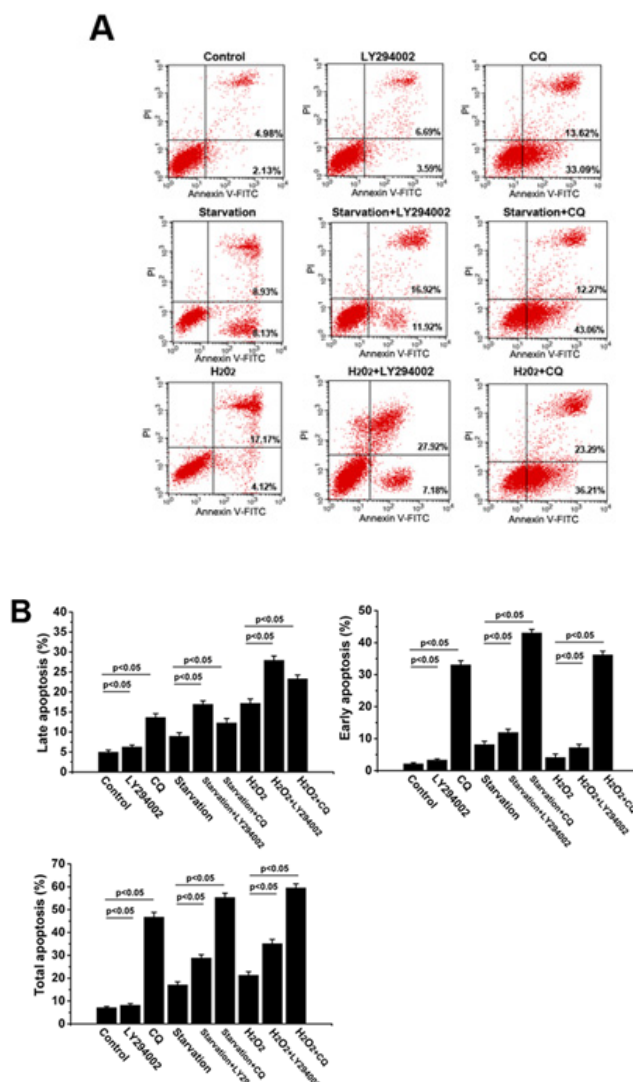

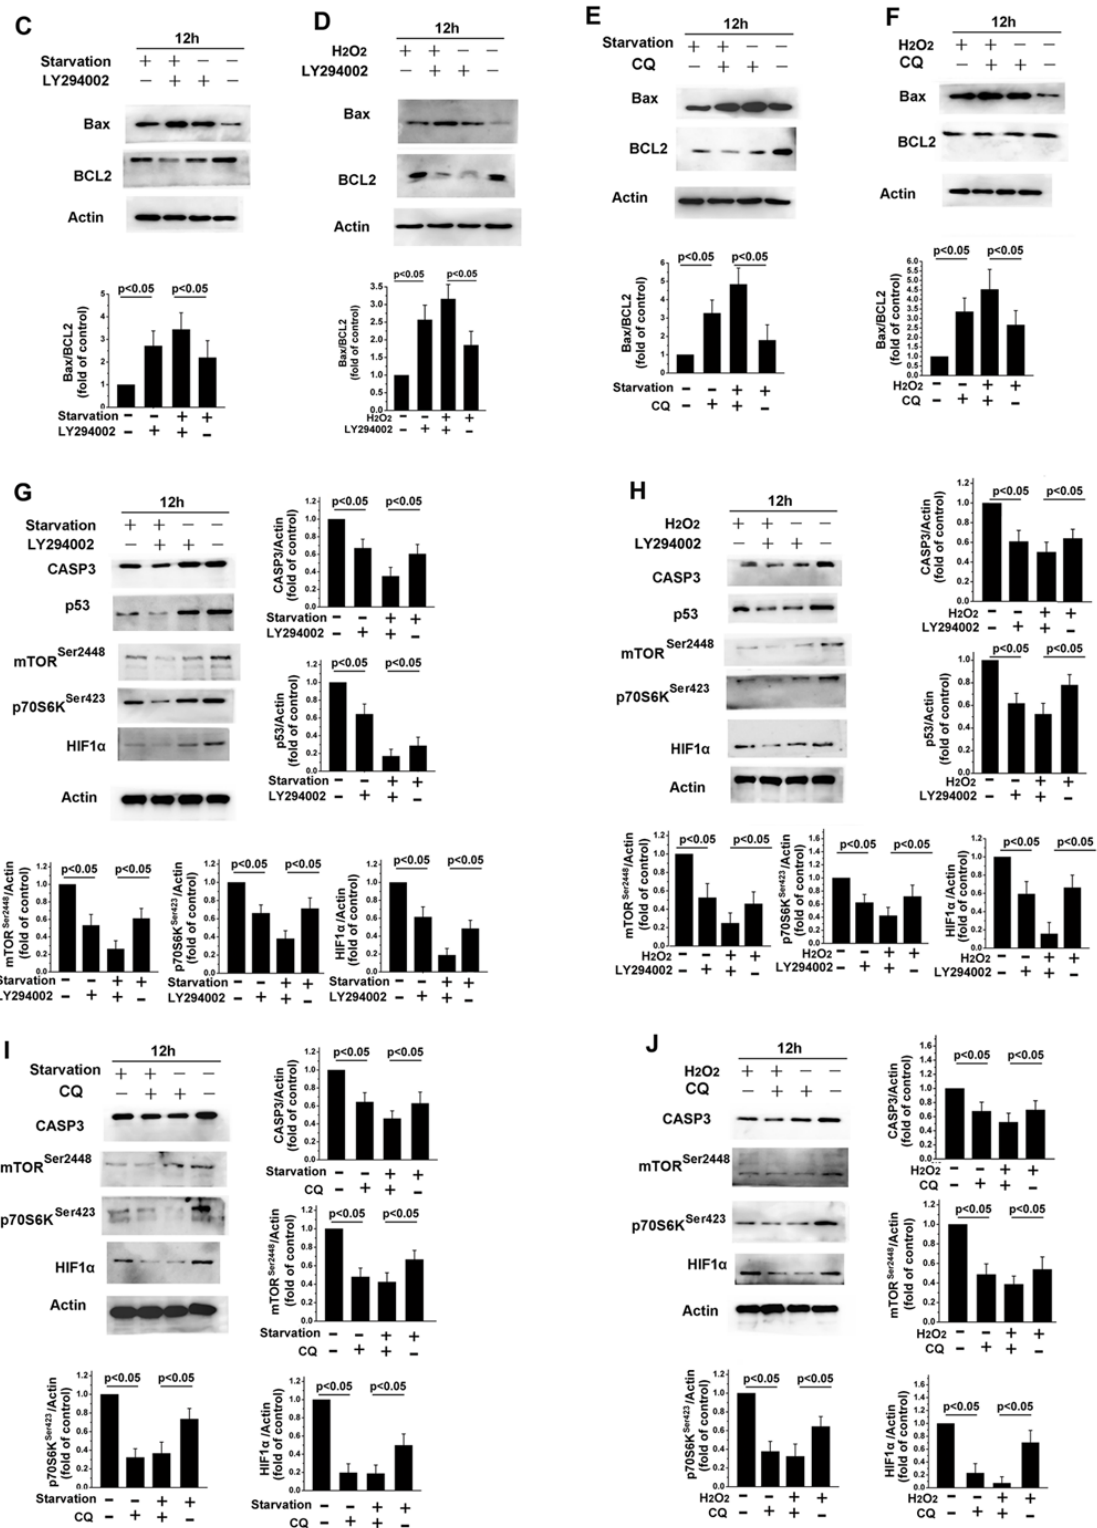

**Figure 4: LY294002-induced inhibition of PI3K/Akt signaling increases apoptosis in skin fibroblasts.** (A) Flow cytometric analysis revealed that 12 h of treatment with LY294002 or CQ increased early and late apoptosis rates, and further increased starvation- or H<sub>2</sub>O<sub>2</sub> treatment-induced increases in apoptosis rates, in skin fibroblasts. (B) Bar graph showing early and late apoptotic cell percentages. Means ± standard error are shown. (C–J) Western blots revealed that Bax levels increased, while Bcl2, p70S6K, p53, HIF1-α, and caspase-3 levels decreased, following 12 h of serum starvation or H<sub>2</sub>O<sub>2</sub> treatment with or without LY294002 or CQ. Bar graphs show mean relative protein levels normalized to β-actin.
